# Supplementary material for: Dirac Nodal Arc Semimetal PtSn4: An Ideal Platform for Understanding Surface Properties and Catalysis for Hydrogen Evolution
Source: PubMed Central journal article supplement (PMC6772105; doi:10.1002/anie.201906109), 2019-08-13
Supplement: ANIE-58-13107-s001.pdf [file ANIE-58-13107-s001.pdf]

## Supporting Information

### **Dirac Nodal Arc Semimetal PtSn<sub>4</sub>: An Ideal Platform for Understanding Surface Properties and Catalysis for Hydrogen Evolution**

*Guowei Li<sup>+</sup>,\* Chenguang Fu<sup>+</sup>, Wujun Shi<sup>+</sup>, Lin Jiao, Jiquan Wu, Qun Yang, Rana Saha, Machteld E. Kamminga, Abhay K. Srivastava, Enke Liu, Aliza N. Yazdani, Nitesh Kumar, Jian Zhang, Graeme R. Blake, Xianjie Liu, Mats Fahlman, Steffen Wirth, Gudrun Auffermann, Johannes Gooth, Stuart Parkin, Vidya Madhavan, Xinliang Feng, Yan Sun<sup>+</sup>,\* and Claudia Felser<sup>++</sup>*

anie\_201906109\_sm\_miscellaneous\_information.pdf

## **Author Contributions**

C.F. Investigation: Equal.

## SUPPORTING INFORMATION

**Experimental Section**

**Materials synthesis.** PtSn<sub>4</sub> single crystal was grown out of a Sn-rich binary melt.<sup>[1]</sup> High-purity starting elements Pt (ingot, 99.99%) and Sn (ingot, 99.999%) were mixed together with an initial stoichiometry of Pt<sub>4</sub>Sn<sub>96</sub>, and the mixture was subsequently placed in an alumina crucible and sealed in a quartz tube under partial Ar pressure. The quartz tube was heated to 600 °C over a period of 5 h, and kept at this temperature for 20 h. Finally, the tube was slowly cooled down to 350 °C over 60 h.

**Characterization.** Single crystal X-ray diffraction (XRD) measurements were performed using a Bruker D8 Venture diffractometer equipped with a Triumph monochromator and Photon100 area detector, operating with Mo K $\alpha$  radiation. Crystal structures at different temperatures are deposited in the Cambridge Structural Database (CSD) of the Cambridge Crystallographic Data Center (CCDC) and can be obtained from [www.ccdc.cam.ac.uk](http://www.ccdc.cam.ac.uk) (100 K: CCDC 1841794; 100 K: CCDC 1841795). For the transmission electron microscopy (TEM) investigation, we have prepared lamella (6.7  $\mu\text{m}$   $\times$  4.4  $\mu\text{m}$ ) from a single crystal of PtSn<sub>4</sub> by means of a Ga<sup>+</sup> focused ion beam (FIB) milling instrument [FEI Nova Nanolab 600 SEM/FIB] operating at 0.2 keV-30 keV ion beam energy. Lamella was taken out from the bulk single crystal using the standard lift-out procedure and transferred to a copper grid. Then the lamella was thinned down to the desired thickness. Finally, both the faces of lamella were polished with lower Ga<sup>+</sup> ion-beam energy (5 keV) to reduce the thickness of the damage layer caused by Ga<sup>+</sup> ion implantation and crystal structure amorphization. The longitudinal electrical resistance measurement was conducted using a standard four-probe method with the AC transport option in a PPMS system, with an applied AC current of 16 mA. For all of the transport measurements, the magnetic field was applied along the b-axis, perpendicular to the a–c plane. The XPS spectra were obtained from a UHV surface analysis system equipped with a Scienta-200 hemispherical analyzer. The base pressure of the sample analysis chamber was  $2 \times 10^{-10}$  mbar. To calibrate XPS spectrometer at the right binding energy related to the Fermi level, we use a clean gold film to measure the position of the Fermi level and Au 4f<sub>7/2</sub> peak. The former is at zero binding energy, the latter is at 84.00 eV. Meanwhile, we also check the Ag 3d<sub>5/2</sub> peak at 368.27 eV and Cu 2p<sub>3/2</sub> at 932.67 eV.

**Electrocatalytic characterization.** The HER catalytic measurements were performed on an Autolab PGSTAT302N with an impedance module electrochemistry workstation. A conventional three electrode cell configuration was employed. An Ag/AgCl (3 M KCl) electrode was used as the reference electrode, and a graphite rod was used as the counter electrode. The bulk PtSn<sub>4</sub> single crystal (1 mm  $\times$  5 mm  $\times$  ~ 0.1 mm) was attached to a Cu wire with silver paint and served as working electrode and catalyst. The electrolyte was an Ar saturated 1 M KOH solution. Linear sweep voltammograms were recorded using a PtSn<sub>4</sub> single crystal electrode (1 mm  $\times$  5 mm) with a scan rate of 1 mV / S. All potentials were referenced to a reverse hydrogen electrode (RHE). The stability tests were performed at an overpotential of 39 mV in the initial test, and at 68 mV after air exposure for three months, corresponding to current densities of 10 and 30 mA cm<sup>-2</sup>, respectively. A much longer stability test was

**SUPPORTING INFORMATION**

---

carried out with a constant overpotential of 46 mV. The electrolyte is refreshed every three days. The electrolyte is stirred at a speed of ~ 200 rpm (IKA Magnetic Stirrers).

## SUPPORTING INFORMATION

**Estimation of electrochemical active surface area (ECSA) and Turnover frequency calculations (TOF)**

Since the effective surface area of the catalyst is linearly proportional to the double layer capacitance ( $C_{dl}$ ), we measured the capacitive currents of the single crystal electrode in the potential range of 0.19 ~ 0.29 V vs. RHE with various scan rates (80, 100, 110, 120, 130, 140 mV/s, etc), where no faradic processes are happened. The specific capacitance is determined by plotting the capacitive currents as a function of scan rate. The specific capacitance can be converted into an electrochemical active surface area (ECSA) using the specific capacitance value for a flat standard with 1 cm<sup>2</sup> of real surface area.

According to the XPS and calculations, we assumed that the Pt is the active center and all the exposed Pt atoms in the (001) plane are possible active sites.

The total number of hydrogens turn overs was calculated from the current density according to:<sup>[2]</sup>

$$\# H_2 = \left( j \frac{mA}{cm^2} \right) \left( \frac{1 Cs^{-1}}{1000 mA} \right) \left( \frac{1 mol e^-}{96485.3 C} \right) \left( \frac{1 mol H_2}{1 mol e^-} \right) \left( \frac{6.022 \times 10^{23} H_2}{1 mol H_2} \right) = 3.12 \times 10^{15} \frac{H_2/s}{cm^2} per \frac{mA}{cm^2}$$

Then the HER turnover frequency (TOF) as a function of current density is defined as:

$$TOF = \frac{\left( 3.12 \times 10^{15} \frac{H_2/s}{cm^2} per \frac{mA}{cm^2} \right) \times |j|}{\# active sites \times A_{ECSA}}$$

## SUPPORTING INFORMATION

|                                            |                                                                                   |                      |
|--------------------------------------------|-----------------------------------------------------------------------------------|----------------------|
| Crystal size                               | 0.12 × 0.06 × 0.02 mm <sup>3</sup>                                                |                      |
| Wavelength                                 | 0.71073 Å (Mo K $\alpha$ radiation)                                               |                      |
| Refinement method                          | full matrix least squares on F <sup>2</sup> , anisotropic displacement parameters |                      |
| Absorption correction                      | multi-scan                                                                        |                      |
| <b>Temperature</b>                         | <b>100(2) K</b>                                                                   | <b>300 (2) K</b>     |
| crystal system                             | orthorhombic                                                                      | orthorhombic         |
| space group                                | <i>Ccca</i> (no. 68)                                                              | <i>Ccca</i> (no. 68) |
| symmetry                                   | centrosymmetric                                                                   | centrosymmetric      |
| Z                                          | 4                                                                                 | 4                    |
| D (calculated) (g/cm <sup>3</sup> )        | 9.652                                                                             | 9.567                |
| F(000)                                     | 556                                                                               | 556                  |
| a (Å)                                      | 6.4045(7)                                                                         | 6.4208(7)            |
| b (Å)                                      | 11.3087(15)                                                                       | 11.3592(16)          |
| c (Å)                                      | 6.3646(7)                                                                         | 6.3766(7)            |
| $\alpha$ (°)                               | 90.0                                                                              | 90.0                 |
| $\beta$ (°)                                | 90.0                                                                              | 90.0                 |
| $\gamma$ (°)                               | 90.0                                                                              | 90.0                 |
| volume (Å <sup>3</sup> )                   | 460.97(9)                                                                         | 465.08(10)           |
| absorption coefficient (mm <sup>-1</sup> ) | 51.405                                                                            | 50.951               |
| min / max transmission factor              | 0.1225 / 0.3706                                                                   | 0.1228 / 0.3711      |
| $\theta$ range (degrees)                   | 3.60 – 36.97                                                                      | 3.59 – 36.85         |
| index ranges                               | -8 < h < 8                                                                        | -8 < h < 8           |
|                                            | -14 < k < 14                                                                      | -15 < k < 15         |
|                                            | -8 < l < 8                                                                        | -8 < l < 8           |
| data / restraints / parameters             | 287 / 0 / 13                                                                      | 294 / 0 / 13         |
| GooF on F <sup>2</sup>                     | 1.197                                                                             | 1.199                |
| no. total reflections                      | 4675                                                                              | 4080                 |
| no. unique reflections                     | 287                                                                               | 294                  |
| no. obs Fo > 4 $\sigma$ (Fo)               | 240                                                                               | 239                  |
| R <sub>1</sub> [Fo > 4 $\sigma$ (Fo)]      | 0.0289                                                                            | 0.0313               |
| R <sub>1</sub> [all data]                  | 0.0367                                                                            | 0.0420               |
| wR <sub>2</sub> [Fo > 4 $\sigma$ (Fo)]     | 0.0634                                                                            | 0.0682               |
| wR <sub>2</sub> [all data]                 | 0.0666                                                                            | 0.0733               |

**Table S1.** Crystallographic and refinement parameters of PtSn<sub>4</sub>, measured at 100 K and 300 K.

## SUPPORTING INFORMATION

**100 K**

| Atom | <i>x</i>    | <i>y</i>   | <i>z</i>    | $U_{eq}$ (Å <sup>2</sup> ) |
|------|-------------|------------|-------------|----------------------------|
| Pt   | 0.00000     | 0.25000    | 0.25000     | 0.0068(2)                  |
| Sn   | 0.33436(13) | 0.12338(7) | 0.08470(13) | 0.0073(2)                  |

**300 K**

| Atom | <i>x</i>    | <i>y</i>   | <i>z</i>    | $U_{eq}$ (Å <sup>2</sup> ) |
|------|-------------|------------|-------------|----------------------------|
| Pt   | 0.00000     | 0.25000    | 0.25000     | 0.0099(3)                  |
| Sn   | 0.33403(15) | 0.12340(7) | 0.08410(15) | 0.0124(3)                  |

**Table S2.** Fractional atomic coordinates of the asymmetric unit and equivalent thermal displacement parameters.

## SUPPORTING INFORMATION

| 100 K                    |        |           | 300 K                    |        |           |
|--------------------------|--------|-----------|--------------------------|--------|-----------|
| Interatomic distance (Å) |        |           | Interatomic distance (Å) |        |           |
| Pt                       | Sn_\$4 | 2.7773(8) | Pt                       | Sn_\$4 | 2.7825(9) |
| Pt                       | Sn_\$7 | 2.7773(8) | Pt                       | Sn_\$7 | 2.7825(9) |
| Pt                       | Sn_\$9 | 2.7773(8) | Pt                       | Sn_\$9 | 2.7825(9) |
| Pt                       | Sn_\$1 | 2.7773(8) | Pt                       | Sn_\$1 | 2.7825(9) |
| Pt                       | Sn     | 2.7826(9) | Pt                       | Sn     | 2.7905(9) |
| Pt                       | Sn_\$8 | 2.7826(9) | Pt                       | Sn_\$8 | 2.7905(9) |
| Pt                       | Sn_\$5 | 2.7826(9) | Pt                       | Sn_\$5 | 2.7905(9) |
| Pt                       | Sn_\$3 | 2.7826(9) | Pt                       | Sn_\$3 | 2.7905(9) |

**Table S3.** Selected interatomic distances.



## SUPPORTING INFORMATION

---

Operators for generating equivalent atoms:

\$1  $-x+1/2, -y+1/2, -z$

\$2  $-x+1/2, -y, z$

\$3  $-x, -y+1/2, z$

\$4  $x-1/2, y, -z$

\$5  $-x, y, -z+1/2$

\$6  $-x+1, y, -z+1/2$

\$7  $x-1/2, -y+1/2, z+1/2$

\$8  $x, -y+1/2, -z+1/2$

\$9  $-x+1/2, y, z+1/2$

### Associated content

Supporting Information includes crystallographic information files of PtSn<sub>4</sub>, measured at 100 K and 300 K (CIF).

## SUPPORTING INFORMATION

**Computation details**

Density functional theory (DFT) method as implemented in the Vienna ab initio Simulation Package (VASP) was used for the electronic-structure calculations. The exchange–correlation was considered in the revised Perdew-Burke-Ernzerhof (rPBE) parameterized generalized gradient approximation (GGA) and spin–orbital coupling (SOC) was included. After H adsorption, the H atoms are fully relaxed until the force less than 10 meV / Å. The energy cutoff is set as 300 eV. The k-points grid is 6 x 6 x 1.

**Adsorption of H atom(s) on (001)-Sn or Pt of PtSn<sub>4</sub> and (111)-Pt surfaces**

For the H adsorption calculations, the surfaces of PtSn<sub>4</sub> (010) and Pt (111) are chosen for the consideration of the dominating planes based on the STM and XPS results. The 2 × 2 (111) Pt and (010) PtSn<sub>4</sub> surfaces were constructed by cleaving optimized bulk Pt and PtSn<sub>4</sub> in a six- layer-thick slab. The differential adsorption energy of H adsorption is chosen to describe the stability of hydrogen according to the equation<sup>[3]</sup>:

$$\Delta E_{\text{H}} = E(\text{PtSn}_4 + n \text{ H}) - E(\text{PtSn}_4 + (n-1) \text{ H}) - 1/2 E(\text{H}_2)$$

Where  $E(\text{PtSn}_4 + n \text{ H})$  is the total energy of PtSn<sub>4</sub> or Pt with the n hydrogen atoms adsorbed on surface,  $E(\text{PtSn}_4 + (n-1) \text{ H})$  is the total energy of PtSn<sub>4</sub> or Pt with (n-1) hydrogen atoms adsorbed on surface and  $E(\text{H}_2)$  is the total energy of hydrogen molecule in gas phase. This gives the binding energy of single H atom adsorption when n is equal to 1. For the determination of active sites, the top-, hollow-, and bridge sites are considered for all the cases.

**Water dissociation kinetics calculation**

The most energy favorable pattern for water molecule and OH + H pairs adsorbing on slab are obtained by geometric optimization. To search a minimal energy path for water decomposition on the slab, a 2 × 2 × 1 supercell for both Pt (111) and PtSn<sub>4</sub> (010) is adopted, and the complete LST/QST method embedded in CASTEP as implemented in Materials Studio is employed for searching the transition states. The convergence criterion of force is set to be 0.01 eV/Å.

## SUPPORTING INFORMATION

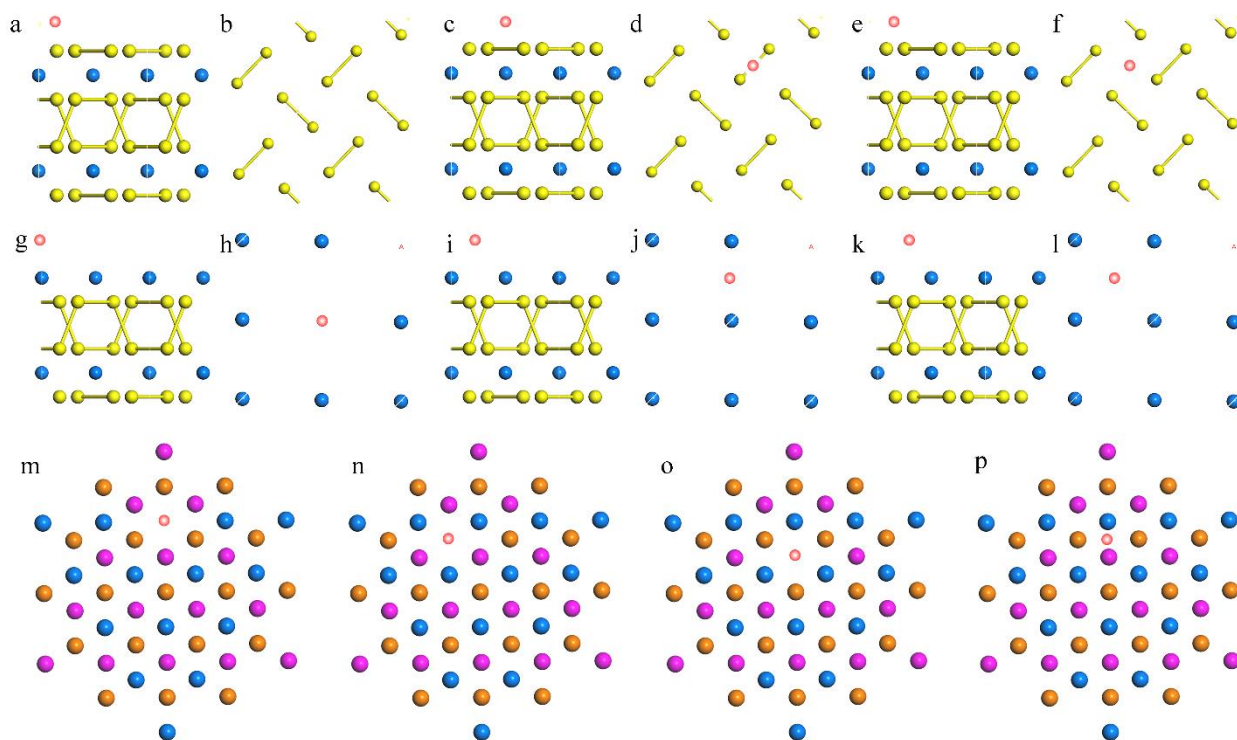

**Figure S1.** Three possible reaction sites were checked for both (a-f) Sn and (g-l) Pt terminals for  $\text{PtSn}_4$ , both top-view (b, d, f, h, j and l) and side-view (a, c, e, g, I, and k) are given for each site. Blue, yellow and pink atoms represent Pt, Sn, and H atoms, respectively. (m-p) Four possible sites were checked for Pt (111) face, m: top, n: fcc, o: hcp, and p: bridge site. The blue, orange and purple atoms represent first, second and third layer of atoms, respectively.

## SUPPORTING INFORMATION

Catalytic activity of PtSn<sub>4</sub> and Pt

The Gibbs free energy  $\Delta G_{H^*}$  of H adsorption on the basal surface of each material are calculated to describe the trends of hydrogen evolution reaction with the following equation:

$$\Delta G_H = \Delta E_H + \Delta E_{ZPE} - T\Delta S_H$$

Here,  $\Delta E_{ZPE}$  and  $\Delta S_H$  are the difference in zero points energy and entropy between the adsorbed species and the gas phase molecule, respectively. For the adsorbed species, they can be determined from the vibrational frequencies of the adsorbed species using normal mode analysis with DFT calculation.<sup>[4]</sup> While for the gas phase molecule, the zero point energy of H<sub>2</sub> and the TS at room temperature (300K) can be looked up from standard molecular tables.<sup>[5]</sup> A good catalyst for hydrogen evolution is characterized with a  $\Delta G_H$  value close to 0.

|              | H on Sn for PtSn <sub>4</sub> | H on Pt for PtSn <sub>4</sub> | Pt (111) | Pt 55 |
|--------------|-------------------------------|-------------------------------|----------|-------|
| $\Delta G_H$ | 0.68                          | -0.28                         | -0.11    | -0.35 |

**Table S4** Gibbs Free energy (eV) of the most stable structure in different materials.

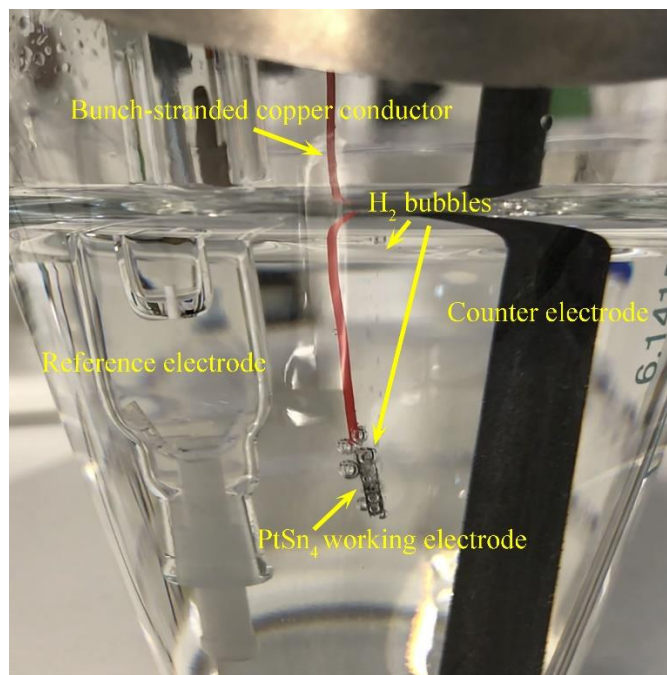

**Figure S2.** Digital picture of the electrochemical cell setup.

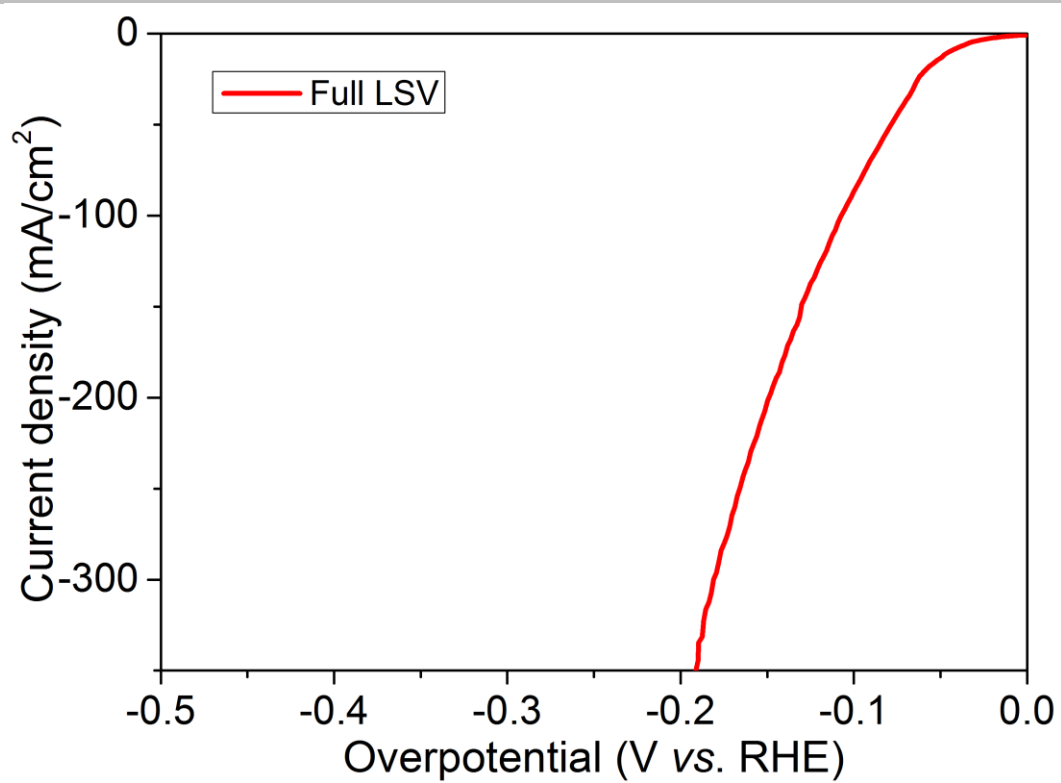

**Figure S3.** Polarization curves of the PtSn<sub>4</sub> single crystal electrode in 1 M KOH solution.

## SUPPORTING INFORMATION

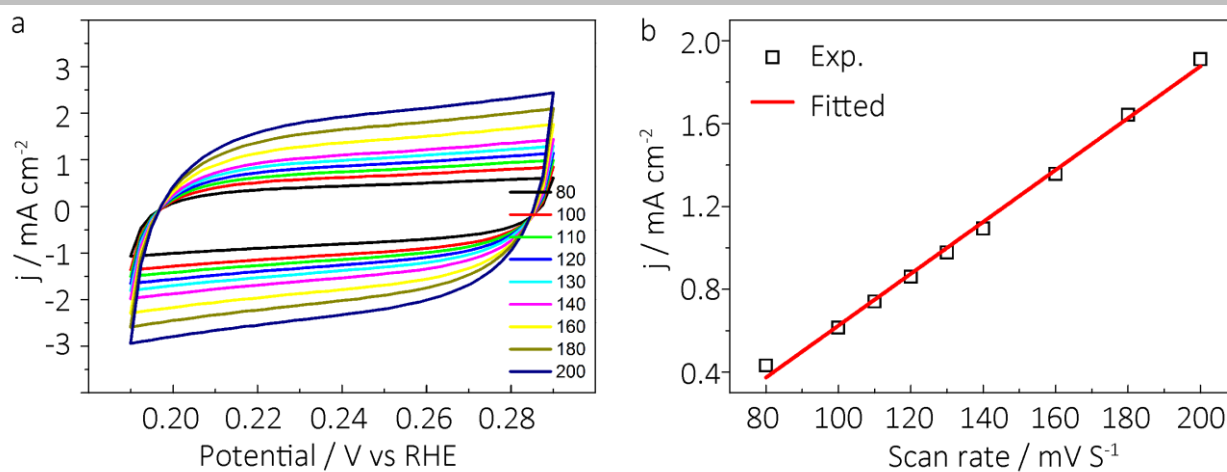

**Figure S4. a.** Electrochemical capacitance measurements to determine the ECSA of PtSn<sub>4</sub> catalyst. **b.** The measured capacitive currents plotted as a function of scan rate.

## SUPPORTING INFORMATION

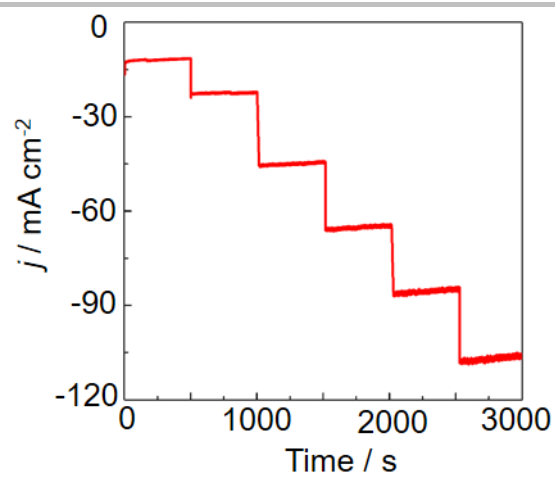

**Figure S5.** Multi-current process with the current density increased from  $10 \text{ mA cm}^{-2}$  to  $110 \text{ mA cm}^{-2}$  without iR correction.



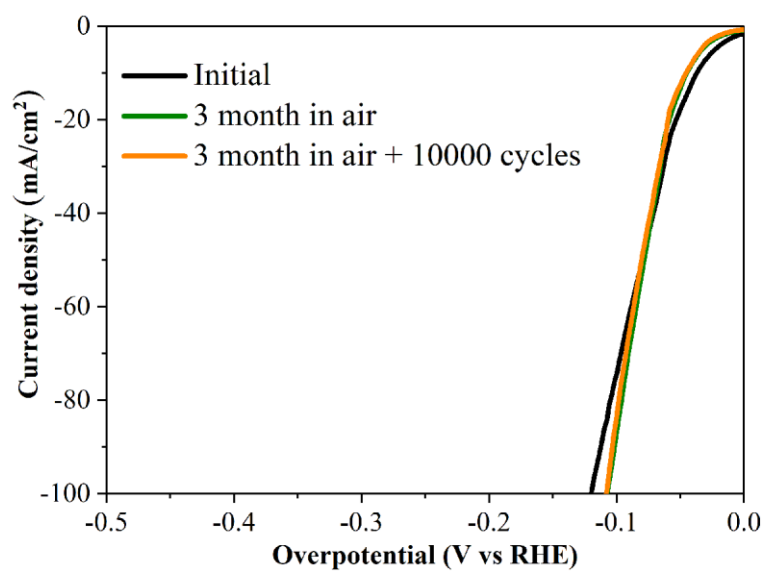

**Figure S6.** Polarization curves of the PtSn<sub>4</sub> single crystal electrode in the initial test, after 3 months, and 10,000 cycles, respectively.

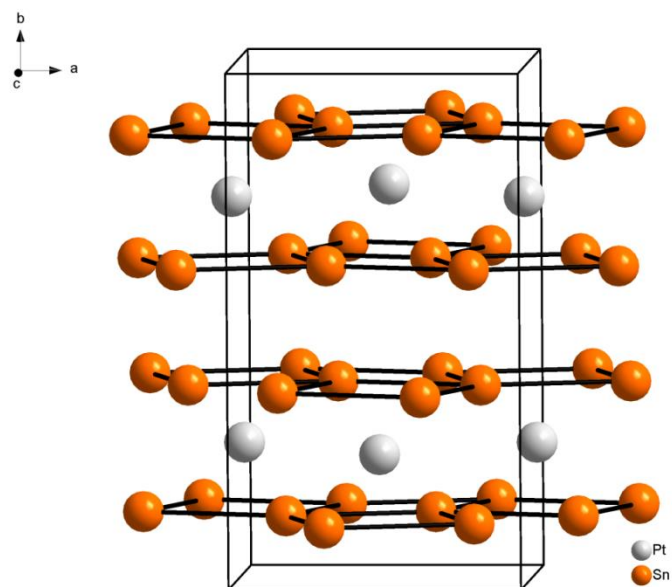

**Figure S7.** Crystal structure of PtSn<sub>4</sub>. The chemical bonds are drawn to illustrate the layered nature of the crystal structure, wherein layers of the main group element (Sn) and transition metal (Pt).

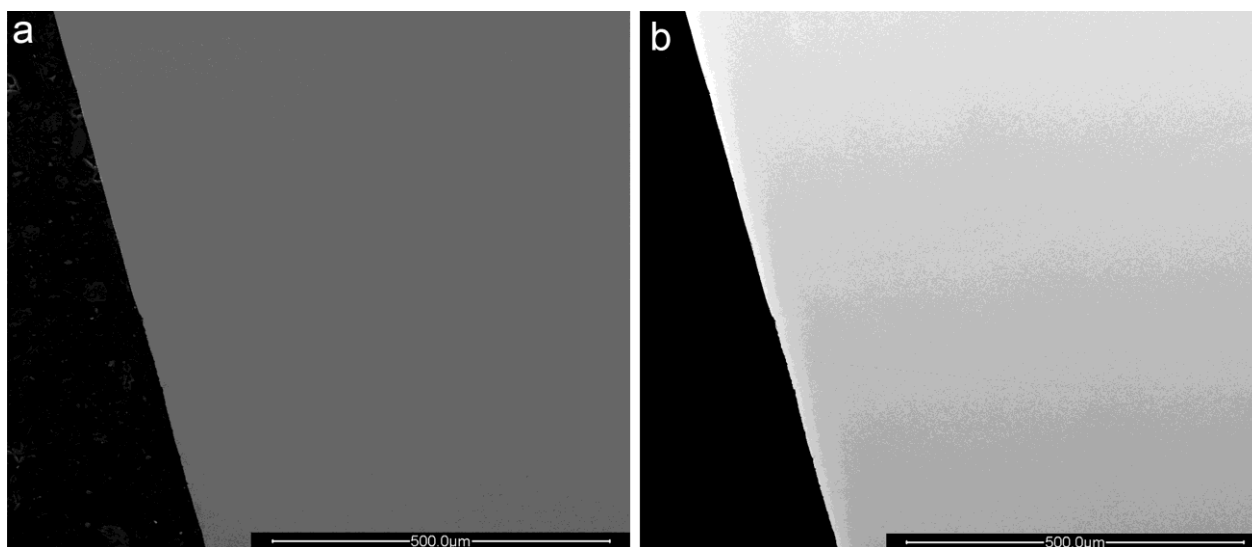

**Figure S8.** **a.** Secondary Electron and **b.** Backscatter Electron images of the crystal surface.

## SUPPORTING INFORMATION

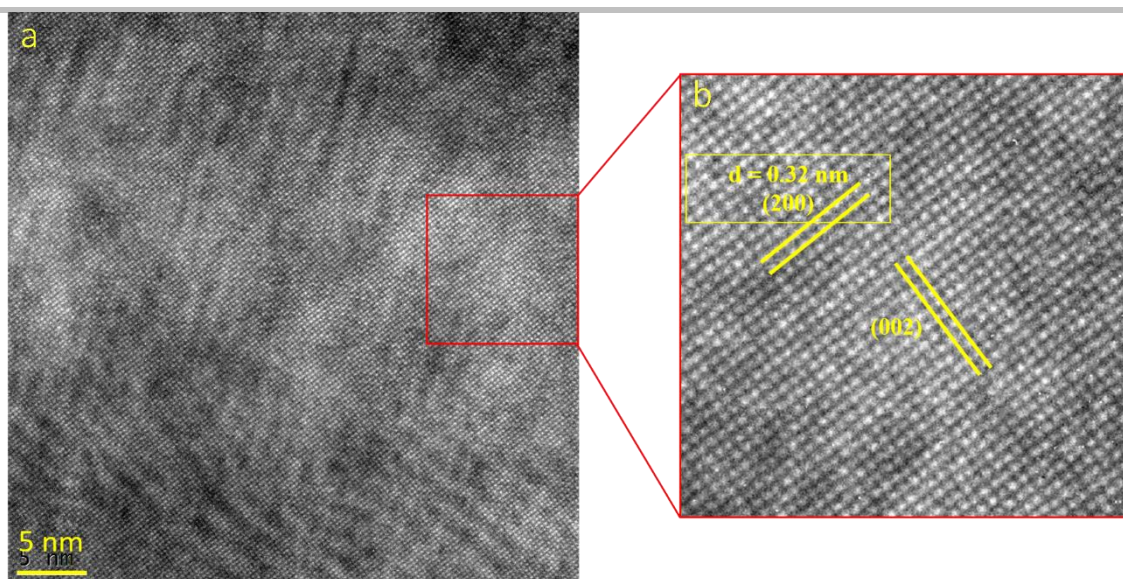

**Figure S9. a and b.** HRTEM of the PtSn<sub>4</sub> single crystal prepared by focused ion beam technique.

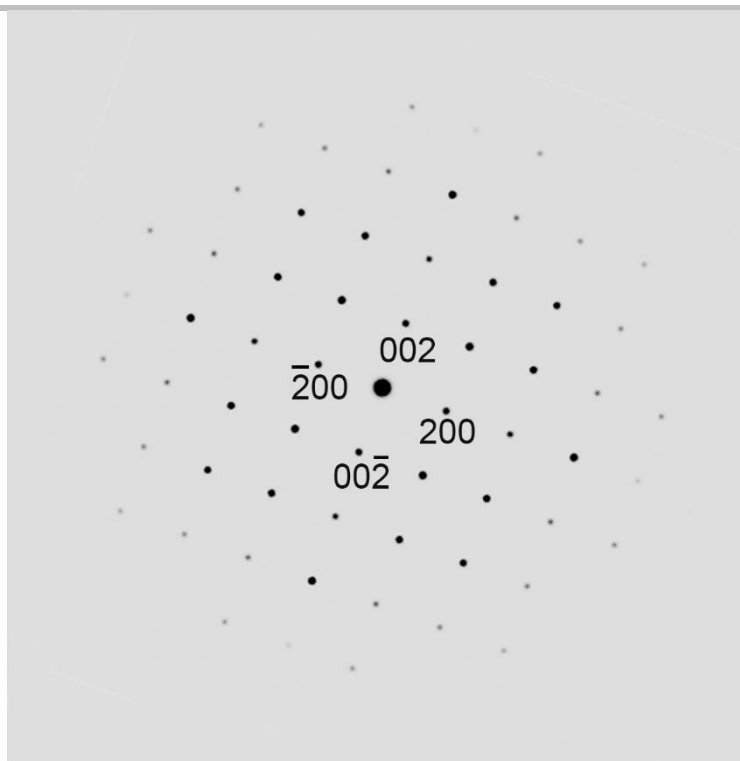

**Figure S10.** Simulated diffraction pattern along the [010] direction of the PtSn<sub>4</sub> single crystal.

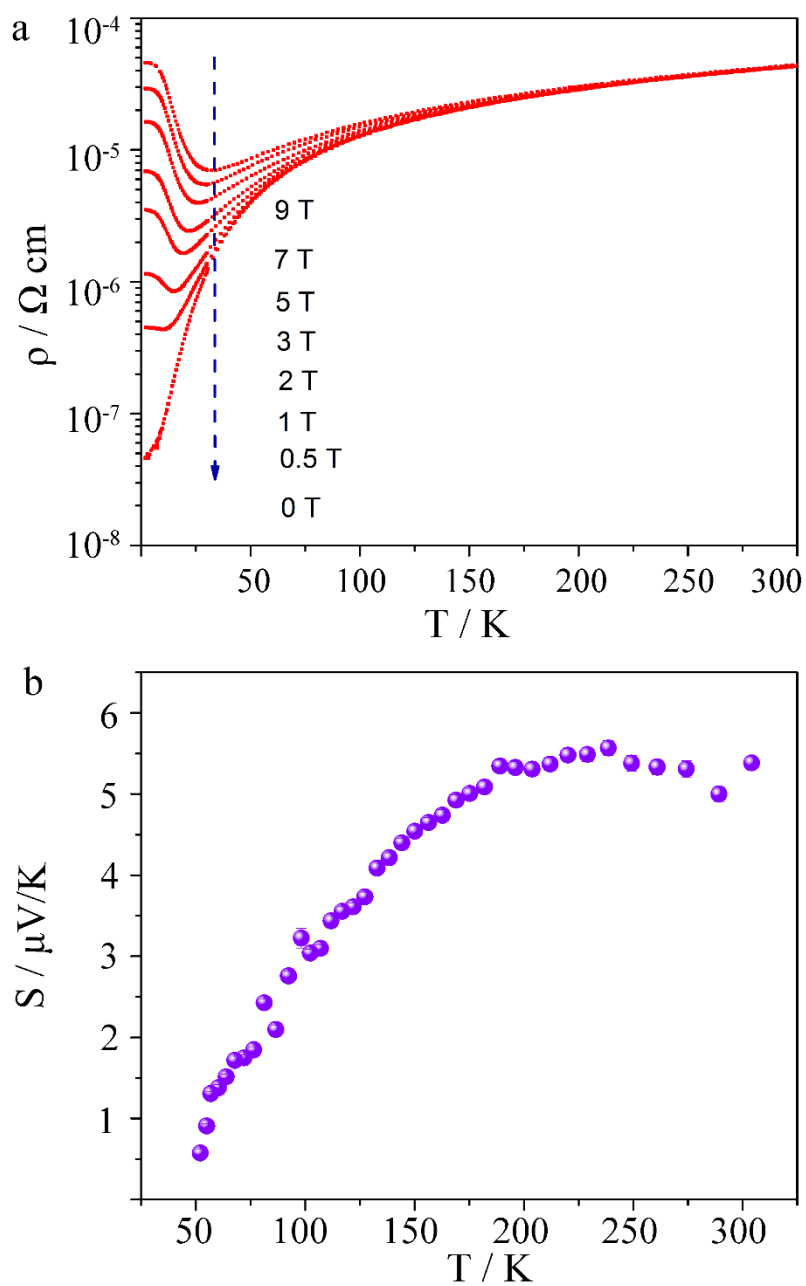

**Figure S11.** **a.** Resistivity as a function of temperature  $T$  for various magnetic fields  $B$ . **b.** The thermopower  $S$  as a function of  $T$ .

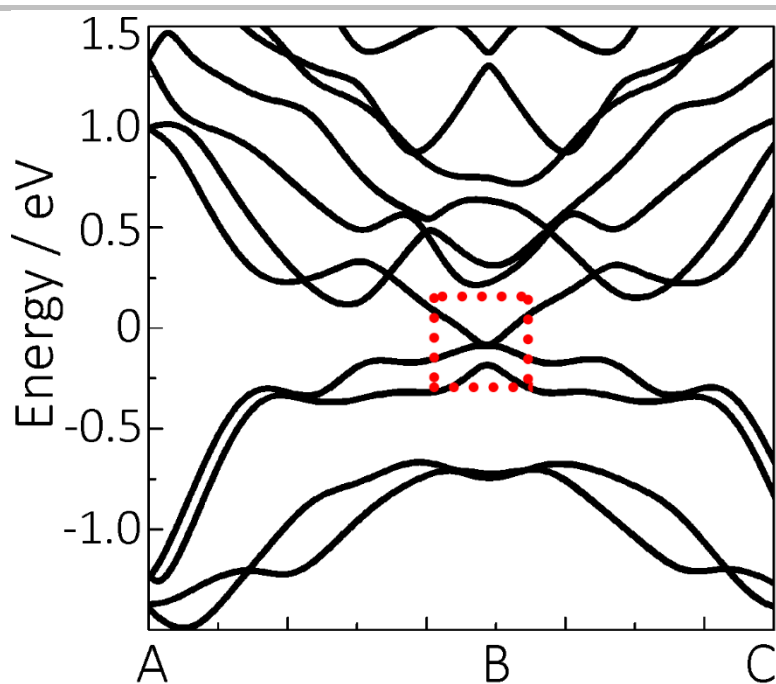

**Figure S12.** Calculated band structure of the single crystal with band crossing shown in the red box, A  $(-0.50, 0.10, 0.42)$ , B  $(-0.50, 0.10, 0.42)$ , C  $(0.50, 0.10, 0.42)$  in unit of  $(2\pi/a, 2\pi/b, 2\pi/c)$ .

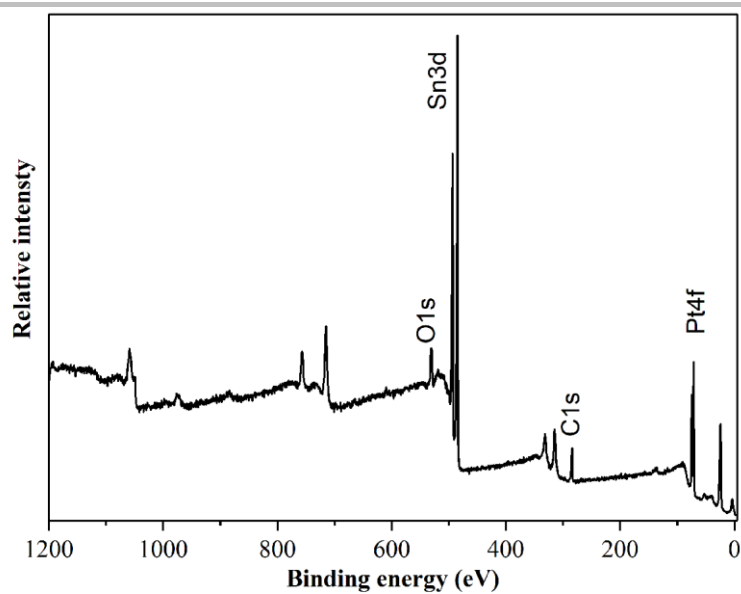

**Figure S13.** XPS survey spectrum on the bulk PtSn<sub>4</sub> single crystal. The appearance of C and O signals indicating the adsorption of small molecular from air on the crystal surface.



## SUPPORTING INFORMATION

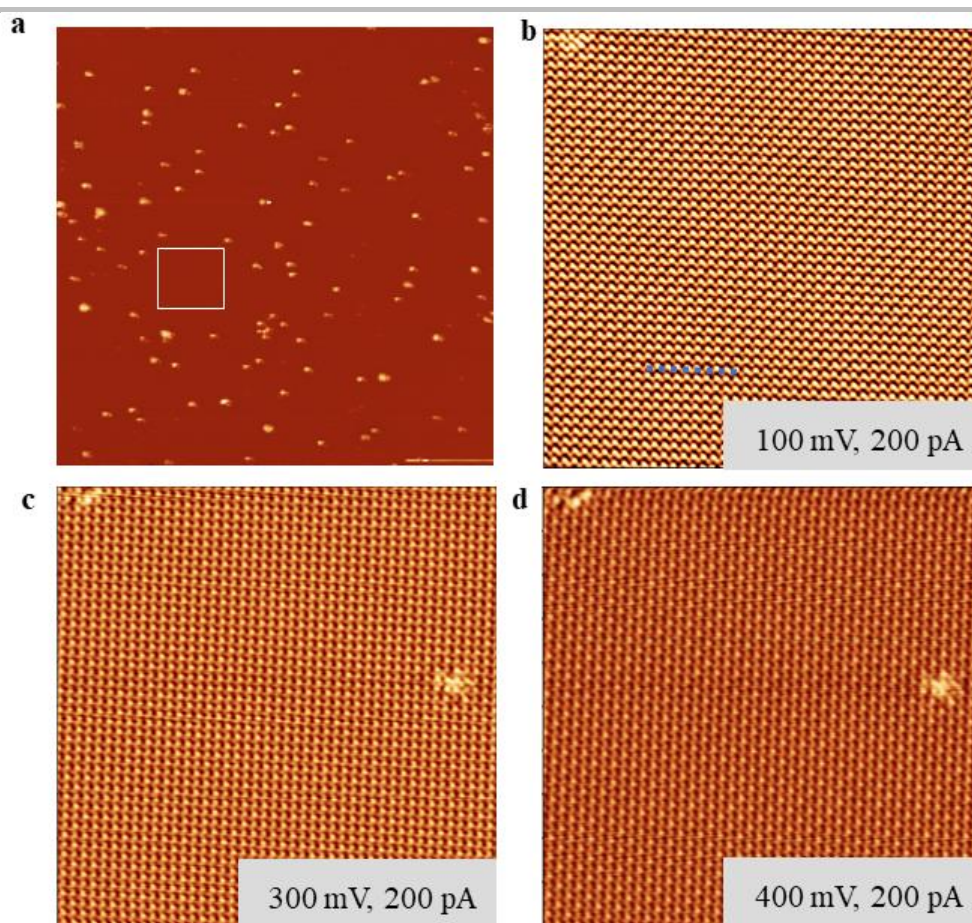

**Figure S14.** STM image of the cleaved PtSn<sub>4</sub> (010) surface, and the corresponding surface with different voltage. **b.** 100 mV, **c.** 300 mV, and **d.** 400 mV.

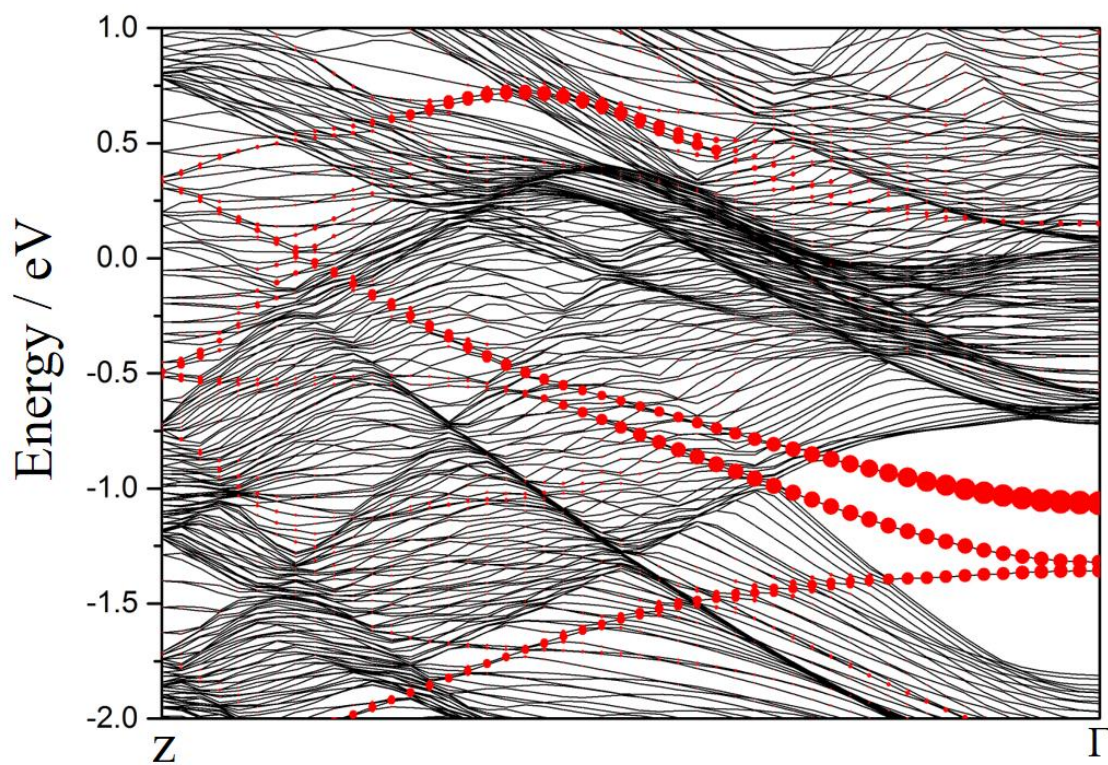

**Figure S15.** Band structure of the clean PtSn<sub>4</sub> (010) surface with Sn terminal

## SUPPORTING INFORMATION

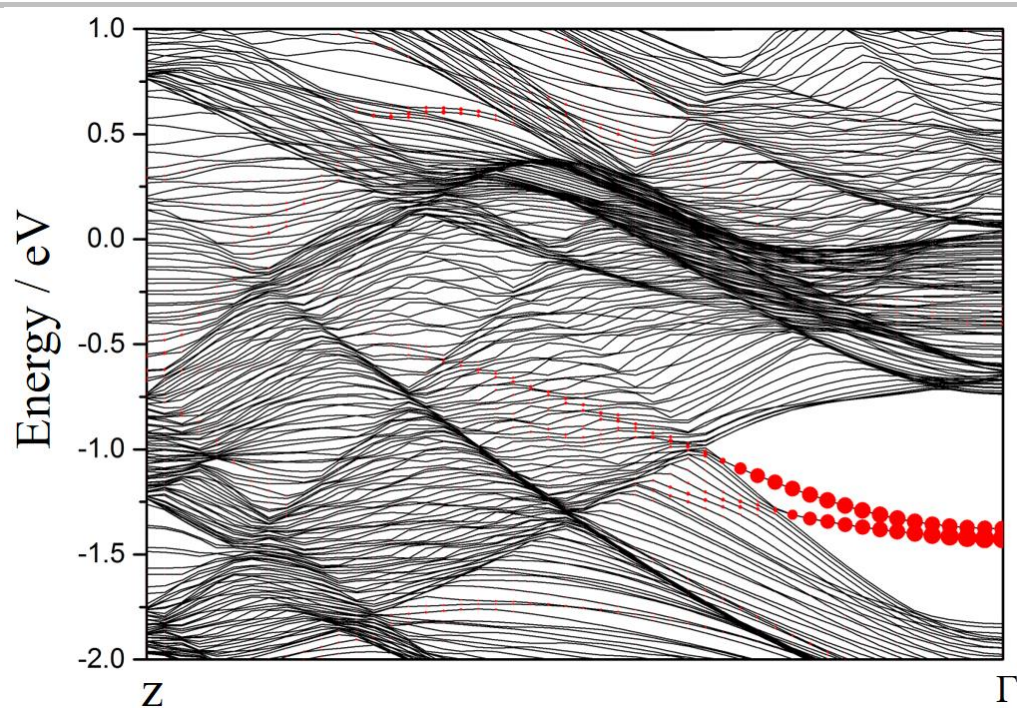

**Figure S16.** Band structure of the clean PtSn<sub>4</sub> (010) surface (red points) with Sn terminal after H adsorption.

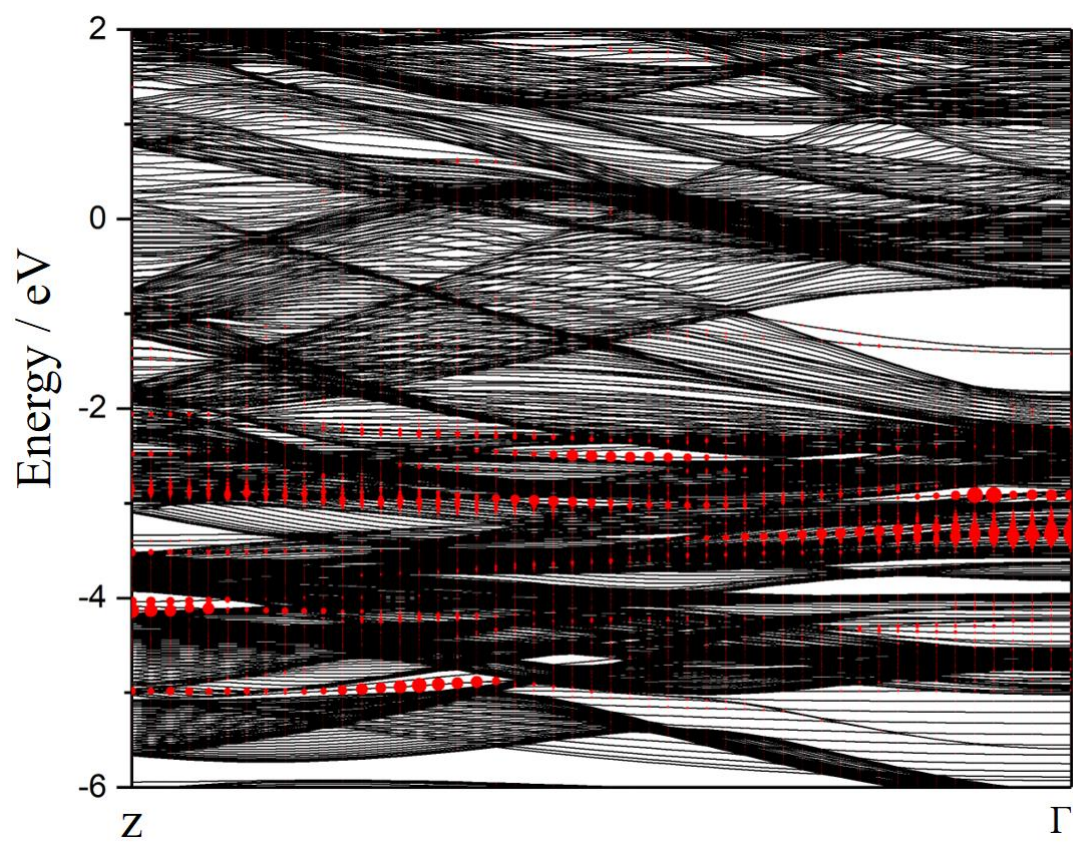

**Figure S17.** The H orbital after accept electrons from the Sn surface states (red points).

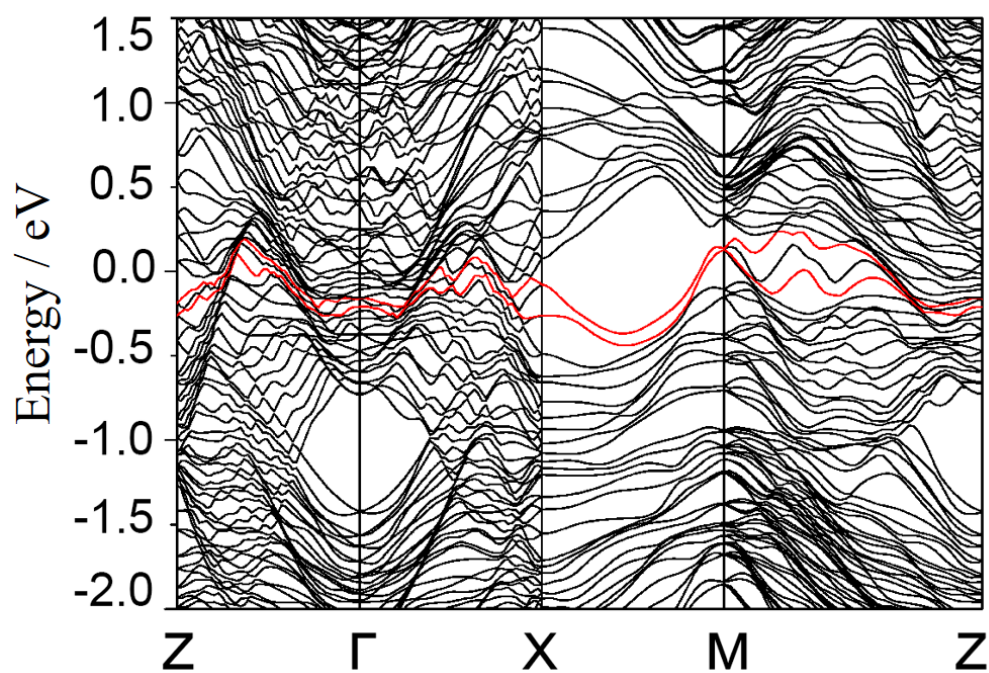

**Figure S18.** Band structure of the PtSn<sub>4</sub> (010) surface without H adsorption. The Pt derived surface states along the direction X→M in the Brillouin zone are shown in red.

## SUPPORTING INFORMATION

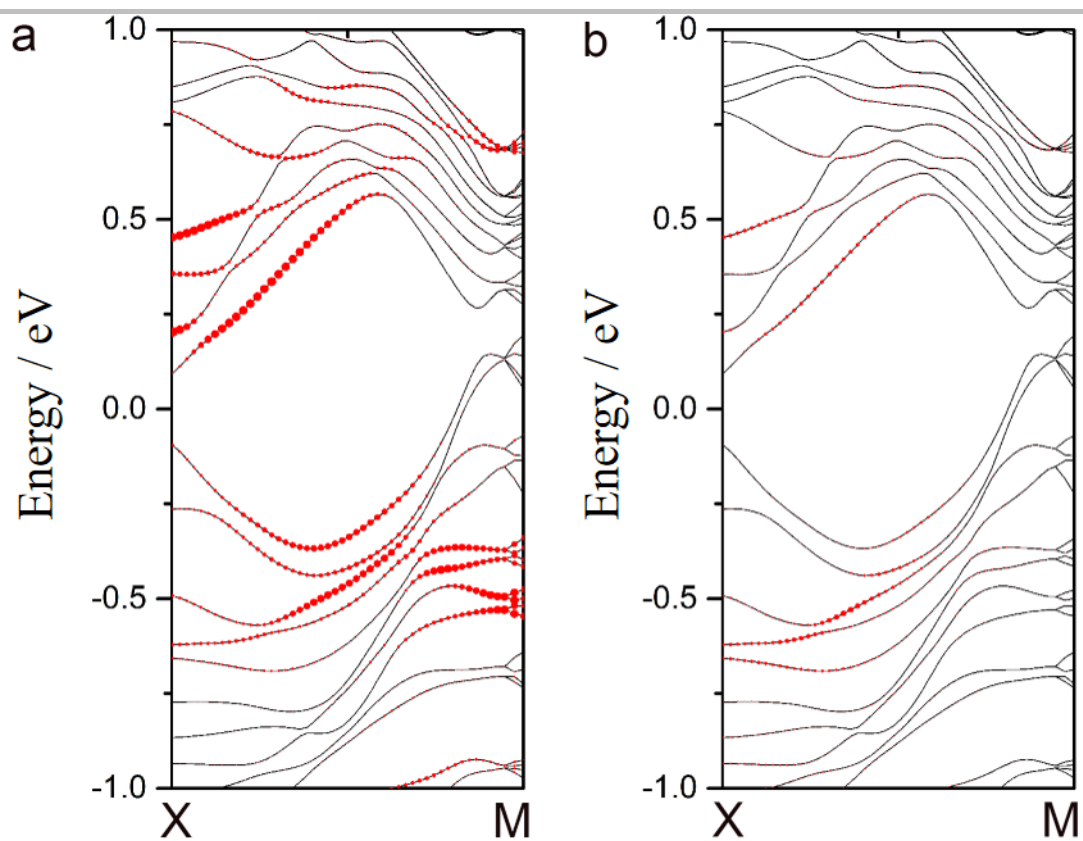

**Figure S19.** The Pt derived surfaces states are composed of **a.** *p* and **b.** *d* electrons states.

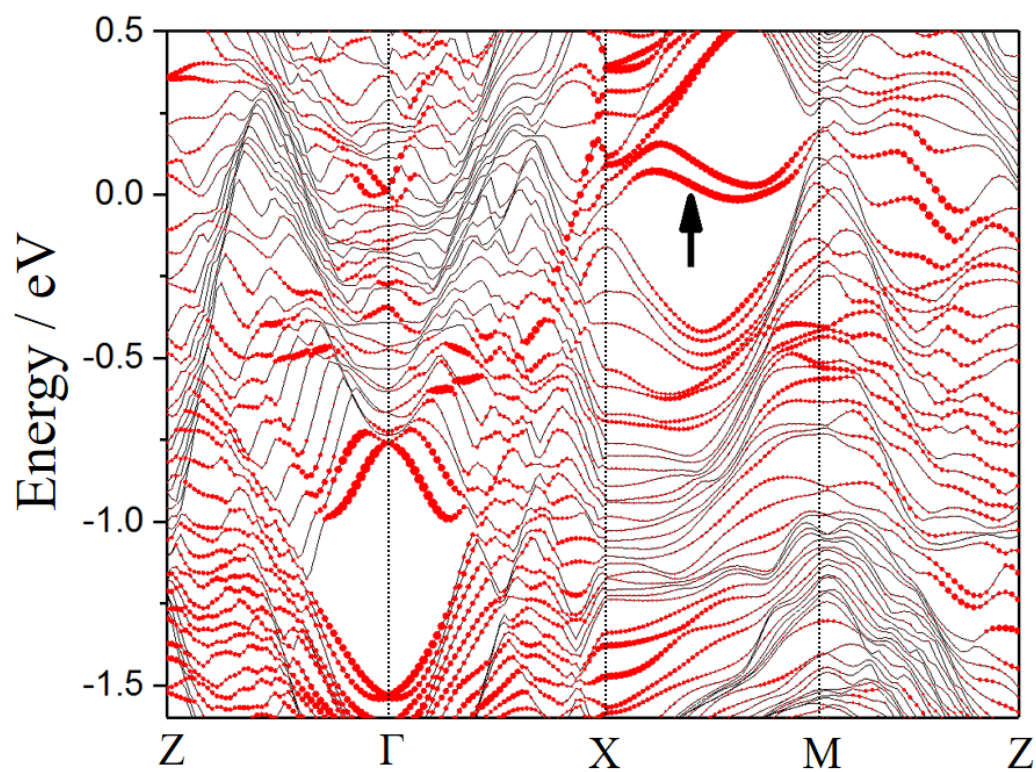

**Figure S20.** The surfaces states shift to the position higher than the Fermi energy after donate the electrons to adsorbed hydrogen.

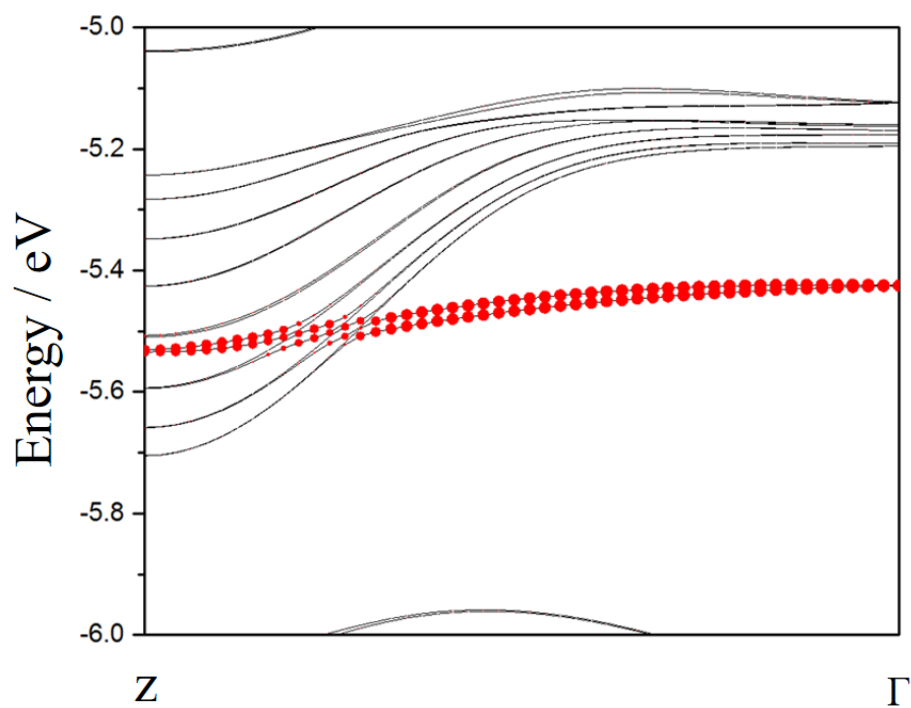

**Figure S21.** The H orbital after accept electrons from the surface states.



## SUPPORTING INFORMATION

| Catalyst                                                 | $j / \text{mA cm}^{-2}$ | Overpotential<br>mV | Tafel slope<br>mV/dec. | References                                   |
|----------------------------------------------------------|-------------------------|---------------------|------------------------|----------------------------------------------|
| <b>PtSn<sub>4</sub> single crystal</b>                   | 10                      | 37                  | 39                     | <b>This work</b>                             |
| <b>np-CuTi</b>                                           | 10                      | 47                  | 110                    | Nat. Comm. 6, 6567 (2015)                    |
| <b>Au-Ru nanowire</b>                                    | 10                      | 50                  | 30.8                   | Nat. Chem. 2018                              |
| <b>Co(OH)<sub>2</sub>/Pt</b>                             | 10                      | 248                 | N/A                    | Nat. Mater. 11, 550-557 (2012).              |
| <b>CoN<sub>x</sub>/C</b>                                 | 10                      | 170                 | 75                     | Nat. Commun. 6, 7992 (2014).                 |
| <b>MoC<sub>x</sub> nano-octahedrons</b>                  | 10                      | 142                 | 53                     | Nat. Comm. 6, 6512 (2015)                    |
| <b>NiFeO<sub>x</sub> nanoparticles</b>                   | 10                      | 88                  | 150                    | Nat. Commun. 6, 7261 (2015)                  |
| <b>CoP nanowire</b>                                      | 10                      | 209                 | 129                    | J. Am. Chem. Soc 136, 7587-7590 (2014)       |
| <b>Mo<sub>2</sub>C nanotubes</b>                         | 10                      | 112                 | 55                     | Angew. Chem. Int. Ed. 54, 15395-15399 (2015) |
| <b>CoPS nanoplate</b>                                    | 10                      | 48                  | 57                     | Nat. Mater. 14, 1245–1251 (2015)             |
| <b>Ru/C<sub>3</sub>N<sub>4</sub>/C</b>                   | 10                      | 79                  | N/A                    | J. Am. Chem. Soc. 138, 16174-16181 (2016)    |
| <b>NiCo<sub>2</sub>O<sub>4</sub> hollow microcuboids</b> | 10                      | 110                 | 49.7                   | Angew. Chem. Int. Ed. 55, 6290-6294 (2016).  |
| <b>Ni-Mo nanopowders</b>                                 | 20                      | 70                  | N/A                    | ACS Catal. 3, 166-169 (2013)                 |
| <b>MoP nanoparticles</b>                                 | 10                      | 130                 | 48                     | Energy Environ. Sci., 7, 2624–2629(2014)     |
| <b>VOOH hollow nanospheres</b>                           | 10                      | 164                 | 104                    | Angew. Chem. Int. Ed. 129, 588-592 (2017)    |
| <b>Pt<sub>3</sub>Ni frame/Ni(OH)<sub>2</sub>/C</b>       | 12.6                    | 100                 | N/A                    | Science 343, 1339-1343 (2014)                |

**Table S5.** Summary of some recently reported representative HER electrocatalysts in basic electrolytes.

SUPPORTING INFORMATION

---

**References**

- [1] E. Mun, H. Ko, G. J. Miller, G. D. Samolyuk, S. L. Bud'ko, P. C. Canfield, *Phys. Rev. B* **2012**, 85.
- [2] aJ. Kibsgaard, T. F. Jaramillo, *Angewandte Chemie* **2014**, 53, 14433-14437; bR. Zhang, X. Wang, S. Yu, T. Wen, X. Zhu, F. Yang, X. Sun, X. Wang, W. Hu, *Adv Mater* **2017**, 29; cY. Zheng, Y. Jiao, Y. Zhu, L. H. Li, Y. Han, Y. Chen, M. Jaroniec, S. Z. Qiao, *J Am Chem Soc* **2016**, 138, 16174-16181.
- [3] B. Hinnemann, P. G. Moses, J. Bonde, K. P. Jørgensen, J. H. Nielsen, S. Horch, I. Chorkendorff, J. K. Nørskov, *J. AM. CHEM. SOC.* **2005**, 127, 5308-5309.
- [4] E. Skúlason, V. Tripkovic, M. E. Björketun, S. Gudmundsdóttir, G. Karlberg, J. Rossmeisl, T. Bligaard, H. Jónsson, J. K. Nørskov, *J Phys. Chem. C* **2010**, 114, 18182-18197.
- [5] P. W. Atkins, **1998**, pp 1485, 1925, and 1942.

**Author Contributions**

G. L. and C.F. conceived and designed the experiments under the supervision of Cl. F., W. S., Q. Y., and Y. S. contributed the theoretical investigation. L. J. performed the STM measurement. J. W., X. L., and M. F. conducted the XPS measurement. R. S., A. S., and S. P. carried out the TEM measurement. M. K. and G. B. contributed to the single crystal XRD. A. Y., N. K., J. Z., X. F., J. G., G.A., and V. M. assisted with the data analysis. G. L. wrote the paper. All authors discussed the results and commented on the manuscript.
